# Supplementary material for: Palate anatomy and morphofunctional aspects of interpterygoid vacuities in temnospondyl cranial evolution
Source: PubMed Central journal article supplement (PMC5023724; doi:10.1007/s00114-016-1402-z), 2016-09-14
Supplement: 114_2016_1402_MOESM4_ESM.pdf [file 114_2016_1402_MOESM4_ESM.pdf]

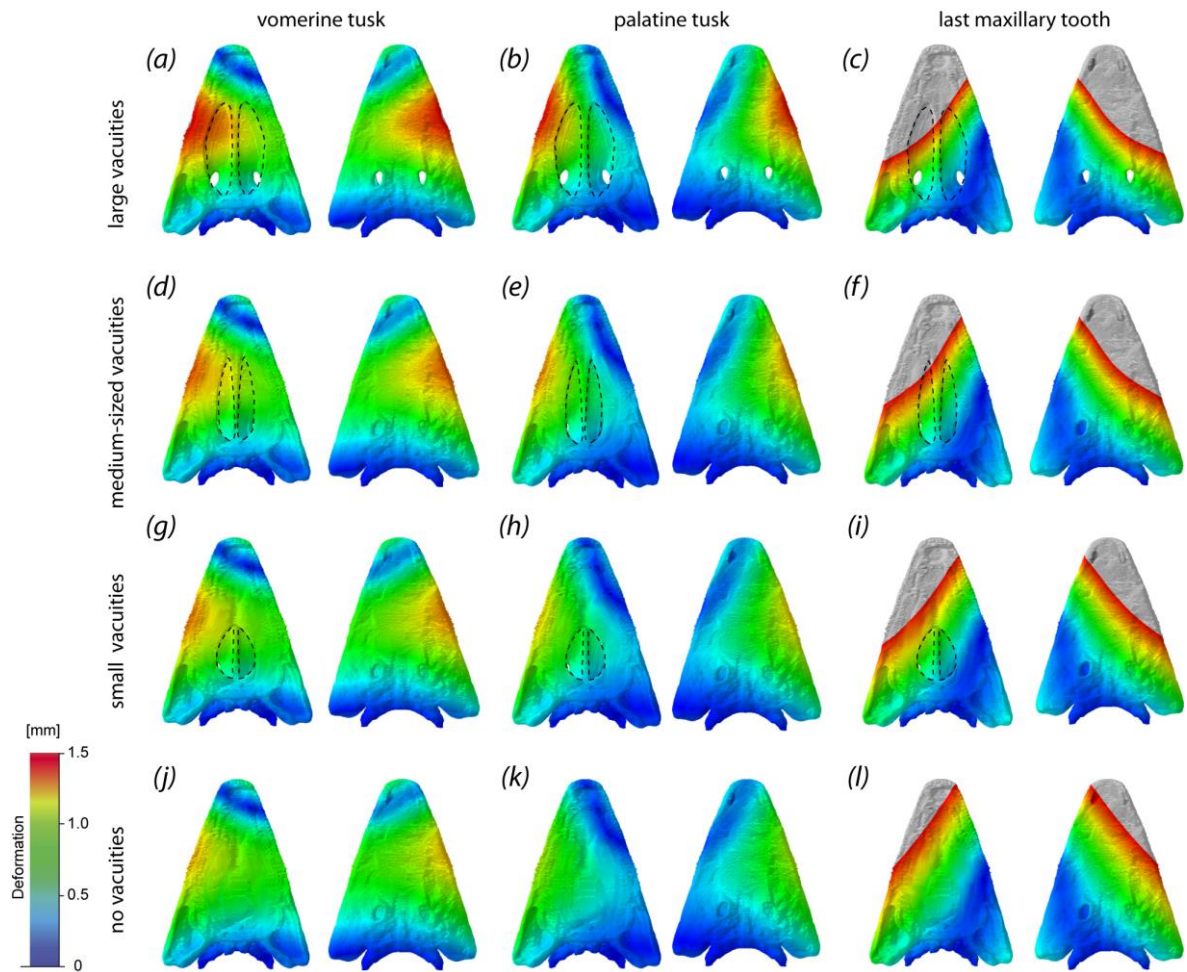

**Supplementary figure 4** Deformation contour plots for different tested cranial configurations and bite points: (a-c) Original model, (d-f) medium-sized interpterygoid vacuities, (g-i) small interpterygoid vacuities, (j-l) closed palatal region. Different bite points: (a, d, g, j) vomerrine tusk, (b, c, h, k) palatine tusk (c, f, i, l) last maxillary tooth. Each in ventral and dorsal view. Location and size of the vacuities highlighted by stippled line.
