# Supplementary material for: Palate anatomy and morphofunctional aspects of interpterygoid vacuities in temnospondyl cranial evolution
Source: PubMed Central journal article supplement (PMC5023724; doi:10.1007/s00114-016-1402-z), 2016-09-14
Supplement: 114_2016_1402_MOESM6_ESM.pdf [file 114_2016_1402_MOESM6_ESM.pdf]

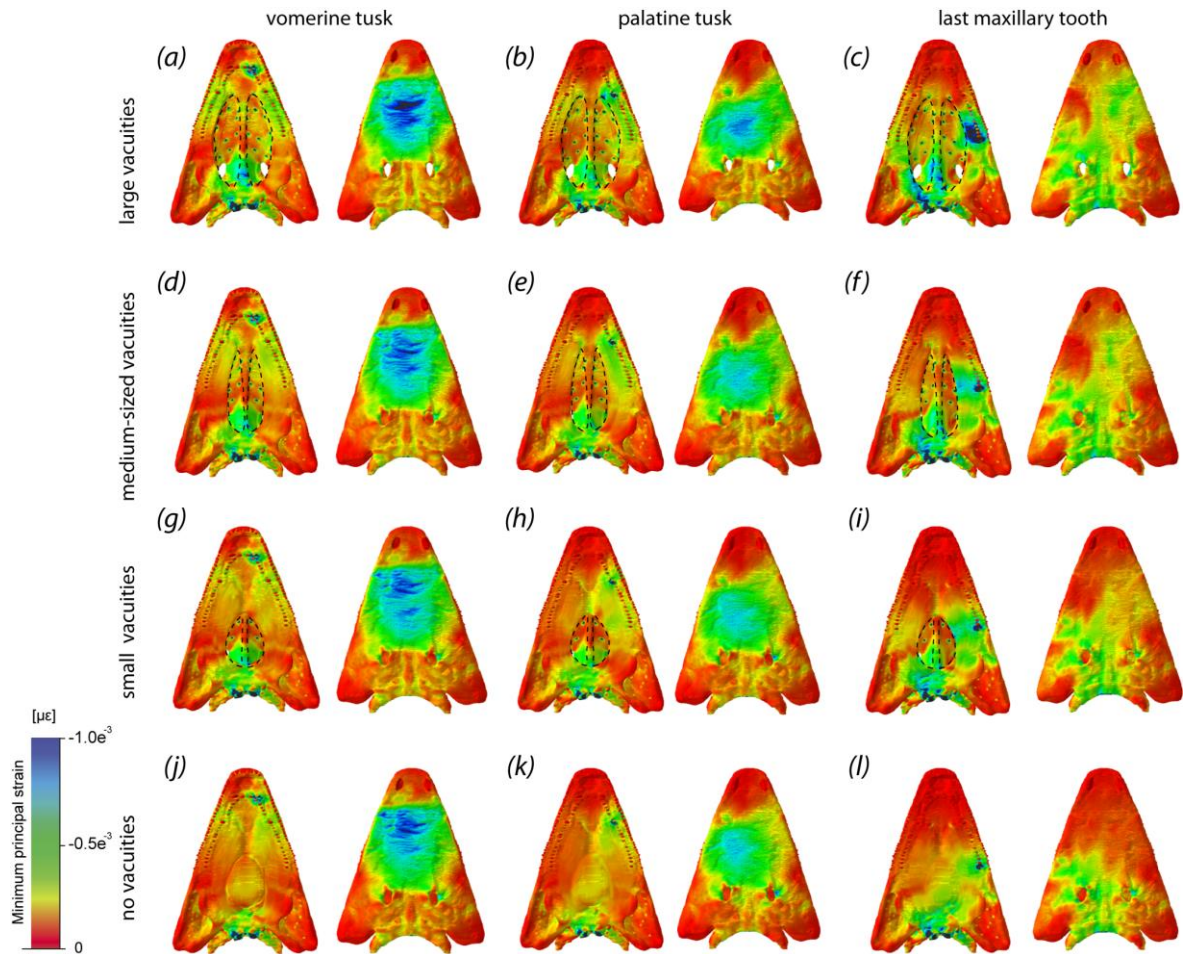

**Supplementary figure 6** Minimum principal strain contour plots for different tested cranial configurations and bite points: (a-c) Original model, (d-f) medium-sized interpterygoid vacancies, (g-i) small interpterygoid vacancies, (j-l) closed palatal region. Different bite points: (a, d, g, j) vomerine tusk, (b, c, h, k) palatine tusk (c, f, i, l) last maxillary tooth. Each in ventral and dorsal view. Location and size of the vacancies highlighted by stippled line.
