# Supplementary material for: Palate anatomy and morphofunctional aspects of interpterygoid vacuities in temnospondyl cranial evolution
Source: PubMed Central journal article supplement (PMC5023724; doi:10.1007/s00114-016-1402-z), 2016-09-14
Supplement: 114_2016_1402_MOESM9_ESM.pdf [file 114_2016_1402_MOESM9_ESM.pdf]

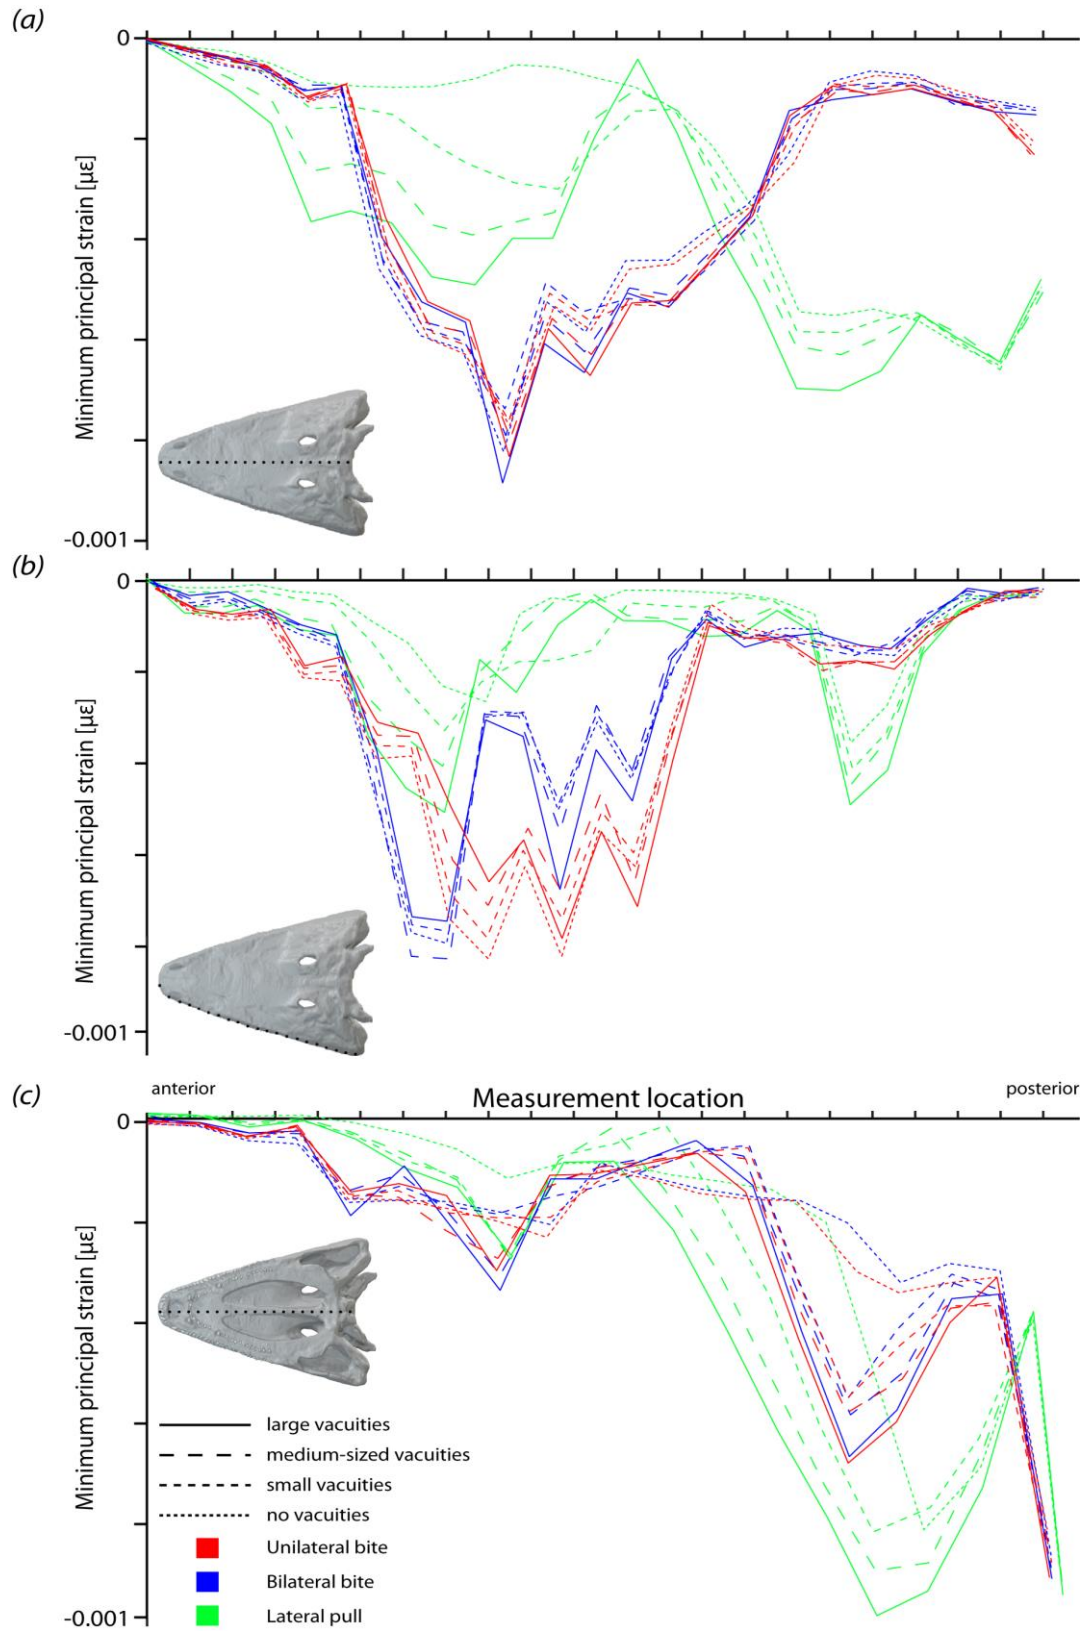

**Supplementary figure 9** Minimum principal strain magnitudes for different tested cranial configurations. Measured along (a) the skull roof, (b) the left lateral margin, (c) the ventral midline.
