# Supplementary material for: Palate anatomy and morphofunctional aspects of interpterygoid vacuities in temnospondyl cranial evolution
Source: PubMed Central journal article supplement (PMC5023724; doi:10.1007/s00114-016-1402-z), 2016-09-14
Supplement: 114_2016_1402_MOESM10_ESM.pdf [file 114_2016_1402_MOESM10_ESM.pdf]

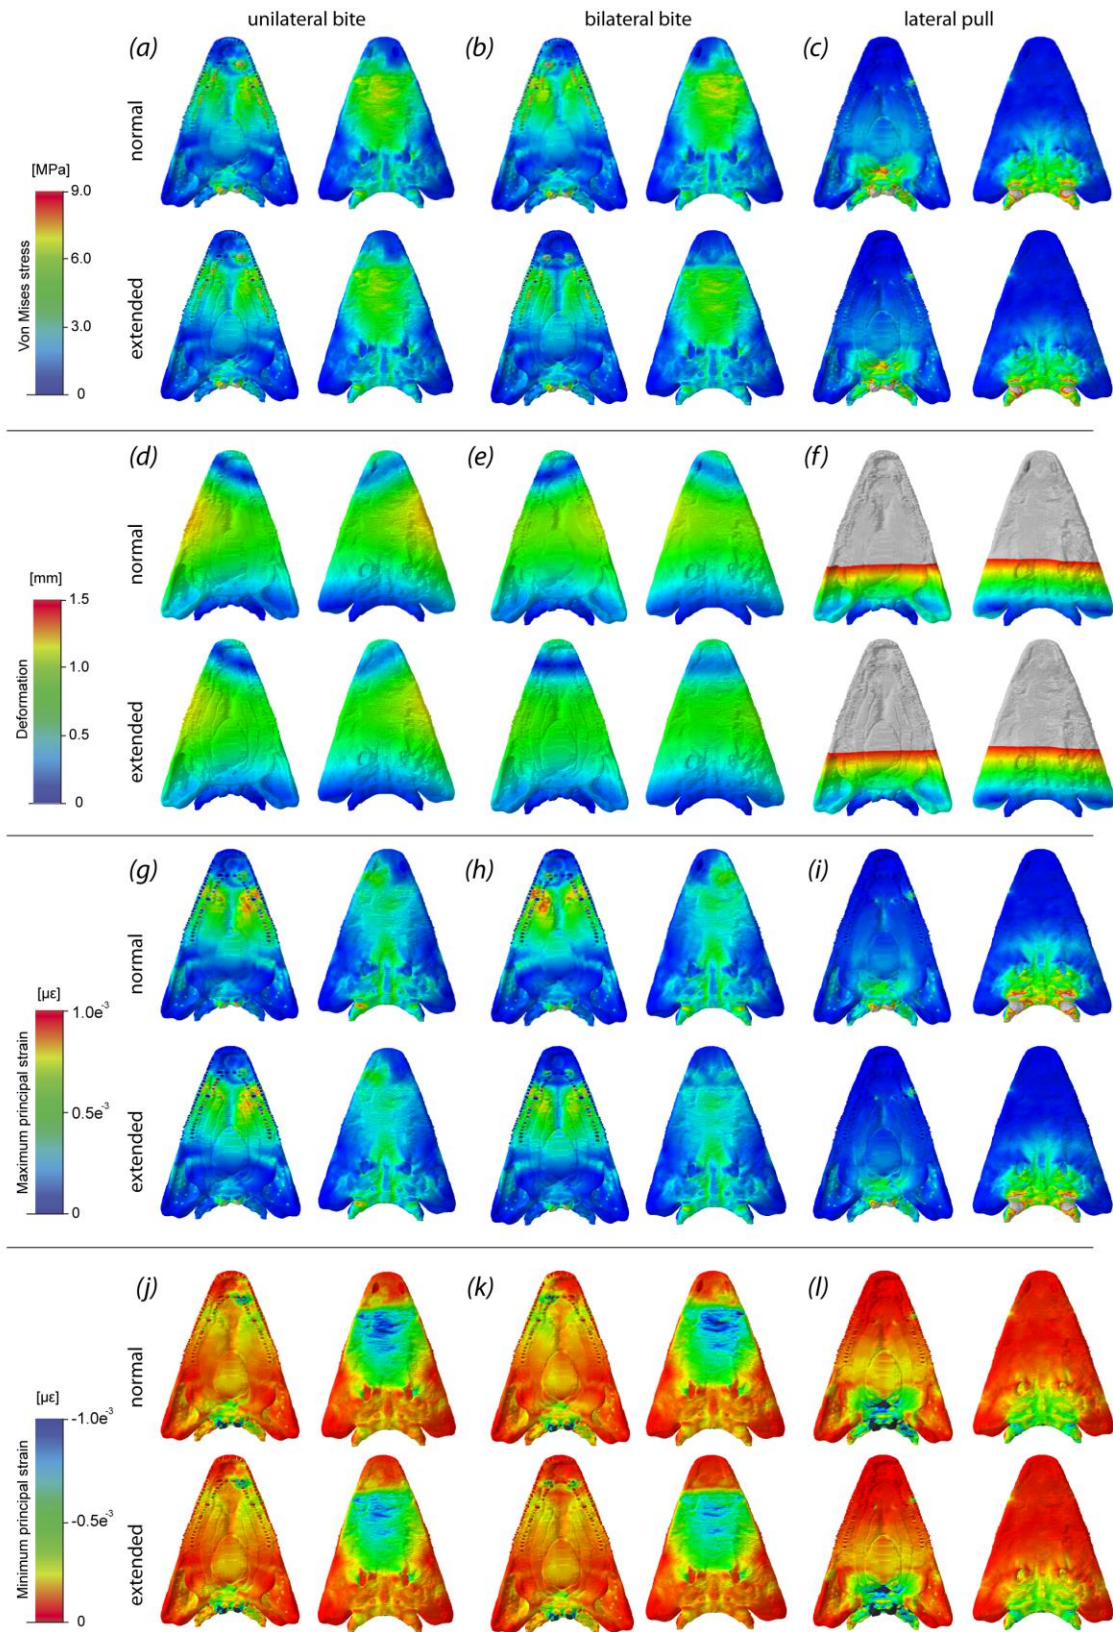

**Supplementary figure 10** Contour plots for different muscle configurations for models with no interpterygoid vacuities. (a-c) Von Mises stress, (d-f) deformation, (g-i) maximum principal strain, and (j-l) minimum principal strain for normal and extended muscle attachments.
